# Supplementary material for: Six Heterocyclic Metabolites from the Myxobacterium Labilithrix luteola
Source: PubMed Central journal article supplement (PMC6017429; doi:10.3390/molecules23030542), 2018-02-28
Supplement: molecules-23-00542-s001.pdf [file molecules-23-00542-s001.pdf]

## Supplemental Information

Six Heterocyclic Metabolites from the Myxobacterium *Labilithrix luteola*

Lucky S. Mulwa<sup>1,2</sup>, Rolf Jansen<sup>1</sup>, Dimas F. Praditya<sup>3</sup>, Kathrin I. Mohr<sup>1,2</sup>, Joachim Wink<sup>2</sup>, Eike Steinmann<sup>3</sup> and Marc Stadler<sup>1,\*</sup>

<sup>1</sup> Department of Microbial Drugs, Helmholtz Centre for Infection Research and German Centre for Infection

Research (DZIF), partner site Hannover/Braunschweig, Inhoffenstrasse 7, 38124 Braunschweig, Germany; luckymulwa@gmail.com (L.S.M.); Rolf.Jansen@helmholtz-hzi.de (R.J.); dimas.praditya@twincore.de (D.F.P); Kathrin.Mohr@helmholtz-hzi.de (K.I.M.); eike.steinmann@twincore.de (E.S.); Joachim.Wink@helmholtz-hzi.de (J.W); Marc.Stadler@helmholtz-hzi.de (M.S.)

<sup>2</sup> Work group Microbial Strain Collection (MISG), Helmholtz Centre for Infection Research, Inhoffenstrasse 7, 38124 Braunschweig, Germany

<sup>3</sup> TWINCORE- Centre for Experimental and Clinical Infection Research (Institute of Experimental Virology) Hanover. Feodor-Lynen-Str. 7-9, 30625 Hannover, Germany. Tel: +49(0)511-220027-133

\* Correspondence: marc.stadler@helmholtz-hzi.de; Tel.: +49 531 6181-4240; Fax: +49 531 6181 9499

Table S1. NMR data of Labindole A (**1**) in CD<sub>3</sub>OD.

| Pos. | $\delta_{C(N)}$ | XHn             | $\delta_H$ | mult. ( <i>J</i> [Hz]) | COSY/N/ROESYH in HMBC |          |                |
|------|-----------------|-----------------|------------|------------------------|-----------------------|----------|----------------|
| 1    | (133.1)         | NH              |            |                        |                       |          | 7, 10          |
| 2    | 134.3           | C               |            |                        |                       |          | 10, 8          |
| 3    | 106.03          | C               |            |                        |                       |          | 10, 8, 9, 4    |
| 3a   | 129.4           | C               |            |                        |                       |          | 10, 8, 5, 7, 4 |
| 4    | 118.1           | CH              | 7.41       | dt (7.7, 0.95)         | 5, 7                  | 8, 5, 9  | 6              |
| 5    | 120.0           | CH              | 6.97       | ddd (7.8, 7.0, 1.4)    | 6, 4                  | 4        | 7              |
| 6    | 121.8           | CH              | 7.02       | ddd (8.1, 7.0, 1.2)    | 5, 7                  | 7        | 5, 4           |
| 7    | 111.6           | CH              | 7.23       | dt (7.9, 0.93)         | 6, 4                  | 6        | 5, 6, 4        |
| 7a   | 137.3           | C               |            |                        |                       |          | 6, 4           |
| 8    | 24.0            | CH <sub>2</sub> | 3.38       | t (7.10)               | 10, 9                 | 10, 9, 4 | 9              |
| 9    | 76.8            | CH <sub>2</sub> | 4.62       | t (7.32)               | 8                     | 8, 4     | 8              |
| 10   | 11.3            | CH <sub>3</sub> | 2.35       | s                      | 8                     | 8        | -              |
| 11   | (388.2)         | N               |            |                        |                       |          | 9, 8           |

<sup>1</sup>H/<sup>13</sup>C/<sup>15</sup>N at 500/125.8/50.7 MHz

Figure S1. NMR correlations Labindole A (**1**)

(blue COSY, green HMBC, purple N/ROESY)

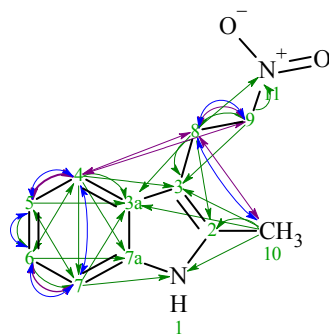

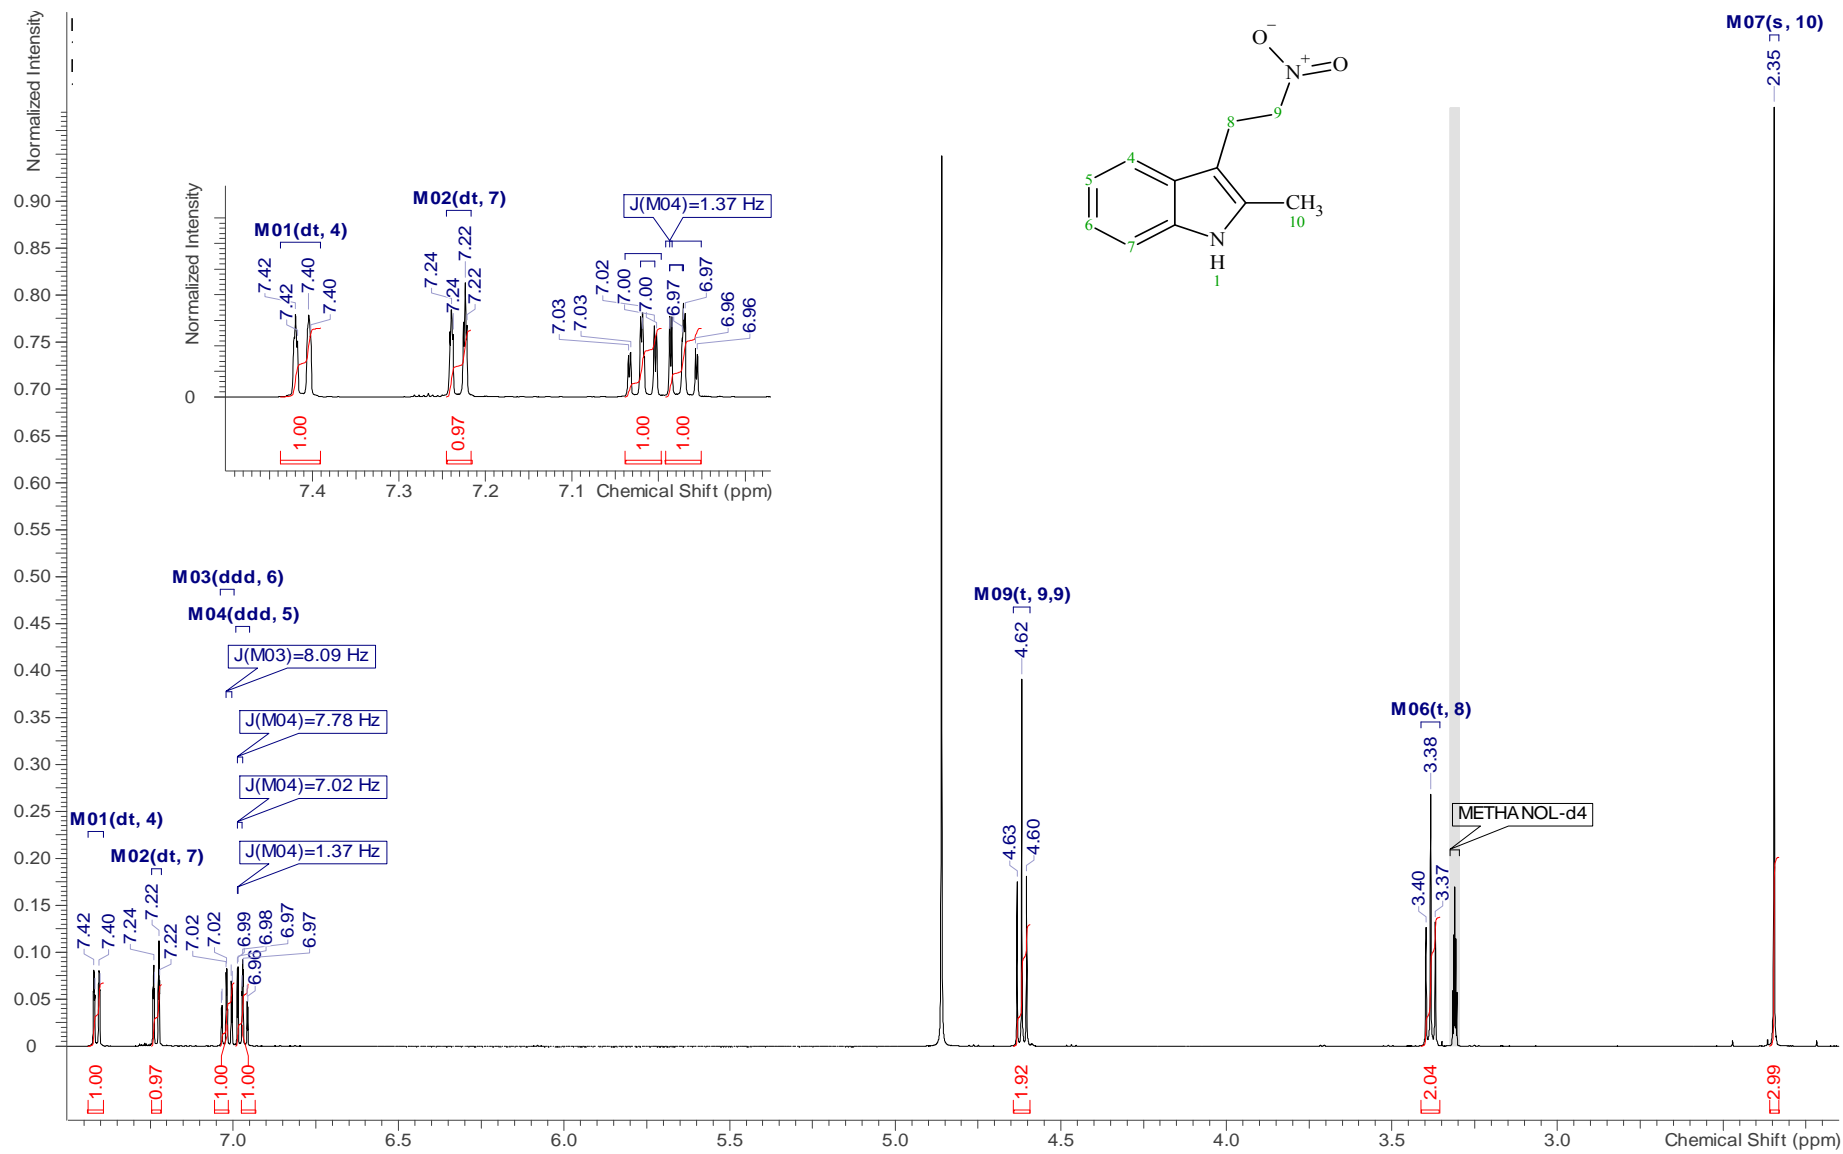

Figure S2. <sup>1</sup>H NMR spectrum of 2-methyl-3-(2-nitro-ethyl)-1H-indole (**1**) in CD<sub>3</sub>OD

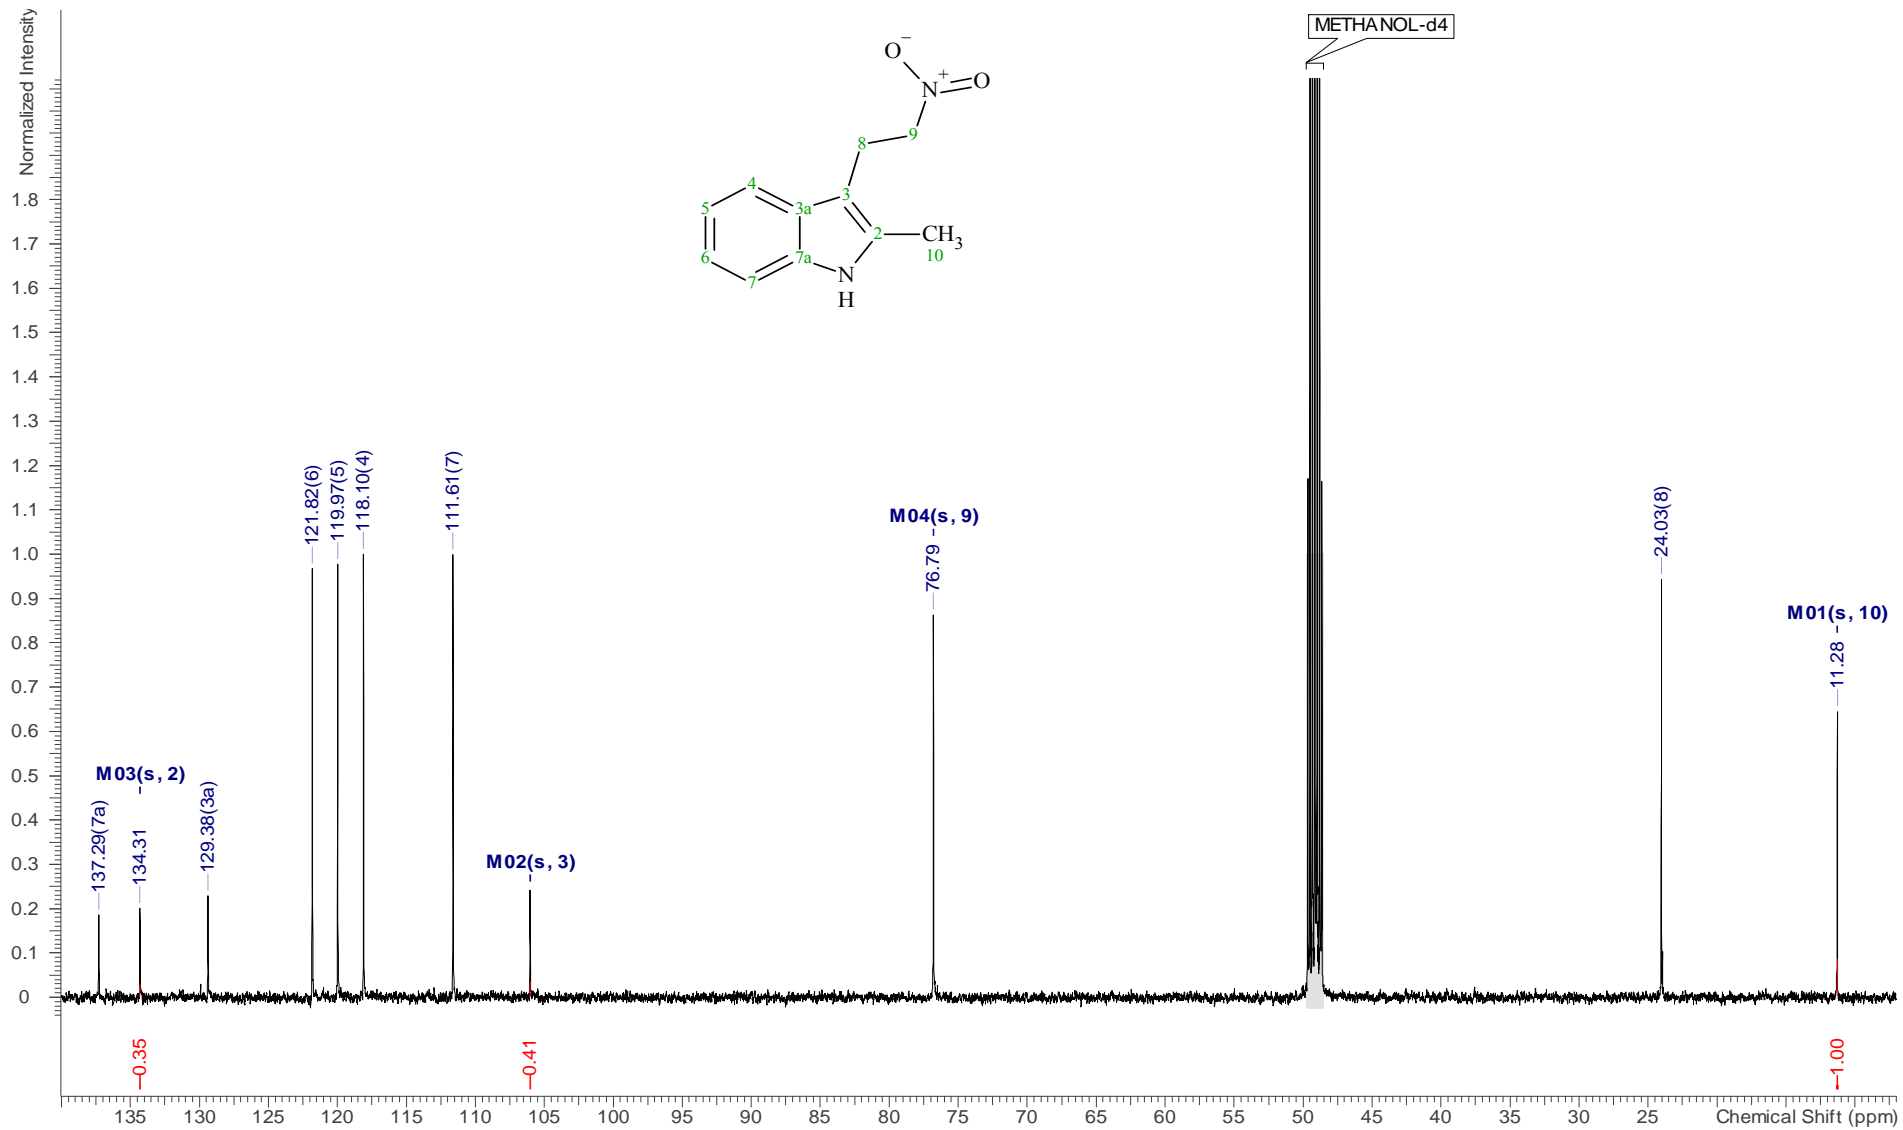

Figure S3. <sup>13</sup>C NMR spectrum of 2-methyl-3-(2-nitro-ethyl)-1H-indole (1) in CD<sub>3</sub>OD.

Table S2. NMR data of Labindole B (**2**) in CDCl<sub>3</sub>.

| Pos. | $\delta_{C(N)}$ | XHn             | $\delta_H$ | mult. (J [Hz]) | COSY/N/ROESY | H in HMBC      |
|------|-----------------|-----------------|------------|----------------|--------------|----------------|
| 1    | (141.4)         | NH              | 8.56       | br s           | 10, 7        | 7, 10          |
| 2    | 144.2           | C               |            |                |              | 10, 8          |
| 3    | 106.5           | C               |            |                |              | 10, 4, 9       |
| 3a   | 125.7           | C               |            |                |              | 10, 5, 7, 4, 8 |
| 4    | 120.1           | CH              | 7.71       | m              | 5, 7         | 5, 9           |
| 5    | 122.6           | CH              | 7.30       | m              | 6, 4         | 4              |
| 6    | 123.6           | CH              | 7.29       | m              | 5, 7         | 4              |
| 7    | 111.4           | CH              | 7.38       | m              | 6, 4         | 1              |
| 7a   | 135.9           | C               |            |                |              | 6, 4           |
| 8    | 132.6           | CH              | 8.35       | d (13.3)       | 9            | 10             |
| 9    | 131.8           | CH              | 7.80       | d (13.3)       | 8            | 4, 10          |
| 10   | 12.5            | CH <sub>3</sub> | 2.66       | s              | 8            | 8, 9, 1        |
| 11   | (375.3)         | N               |            |                |              | 9, 8           |

<sup>1</sup>H/<sup>13</sup>C/<sup>15</sup>N NMR at 500.3/125.8/50.7 MHz

Figure S4. Correlations in the NMR data of Labindole B (**2**)

(blue and red COSY, green HMBC)

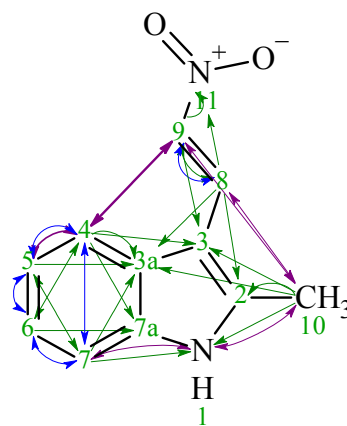

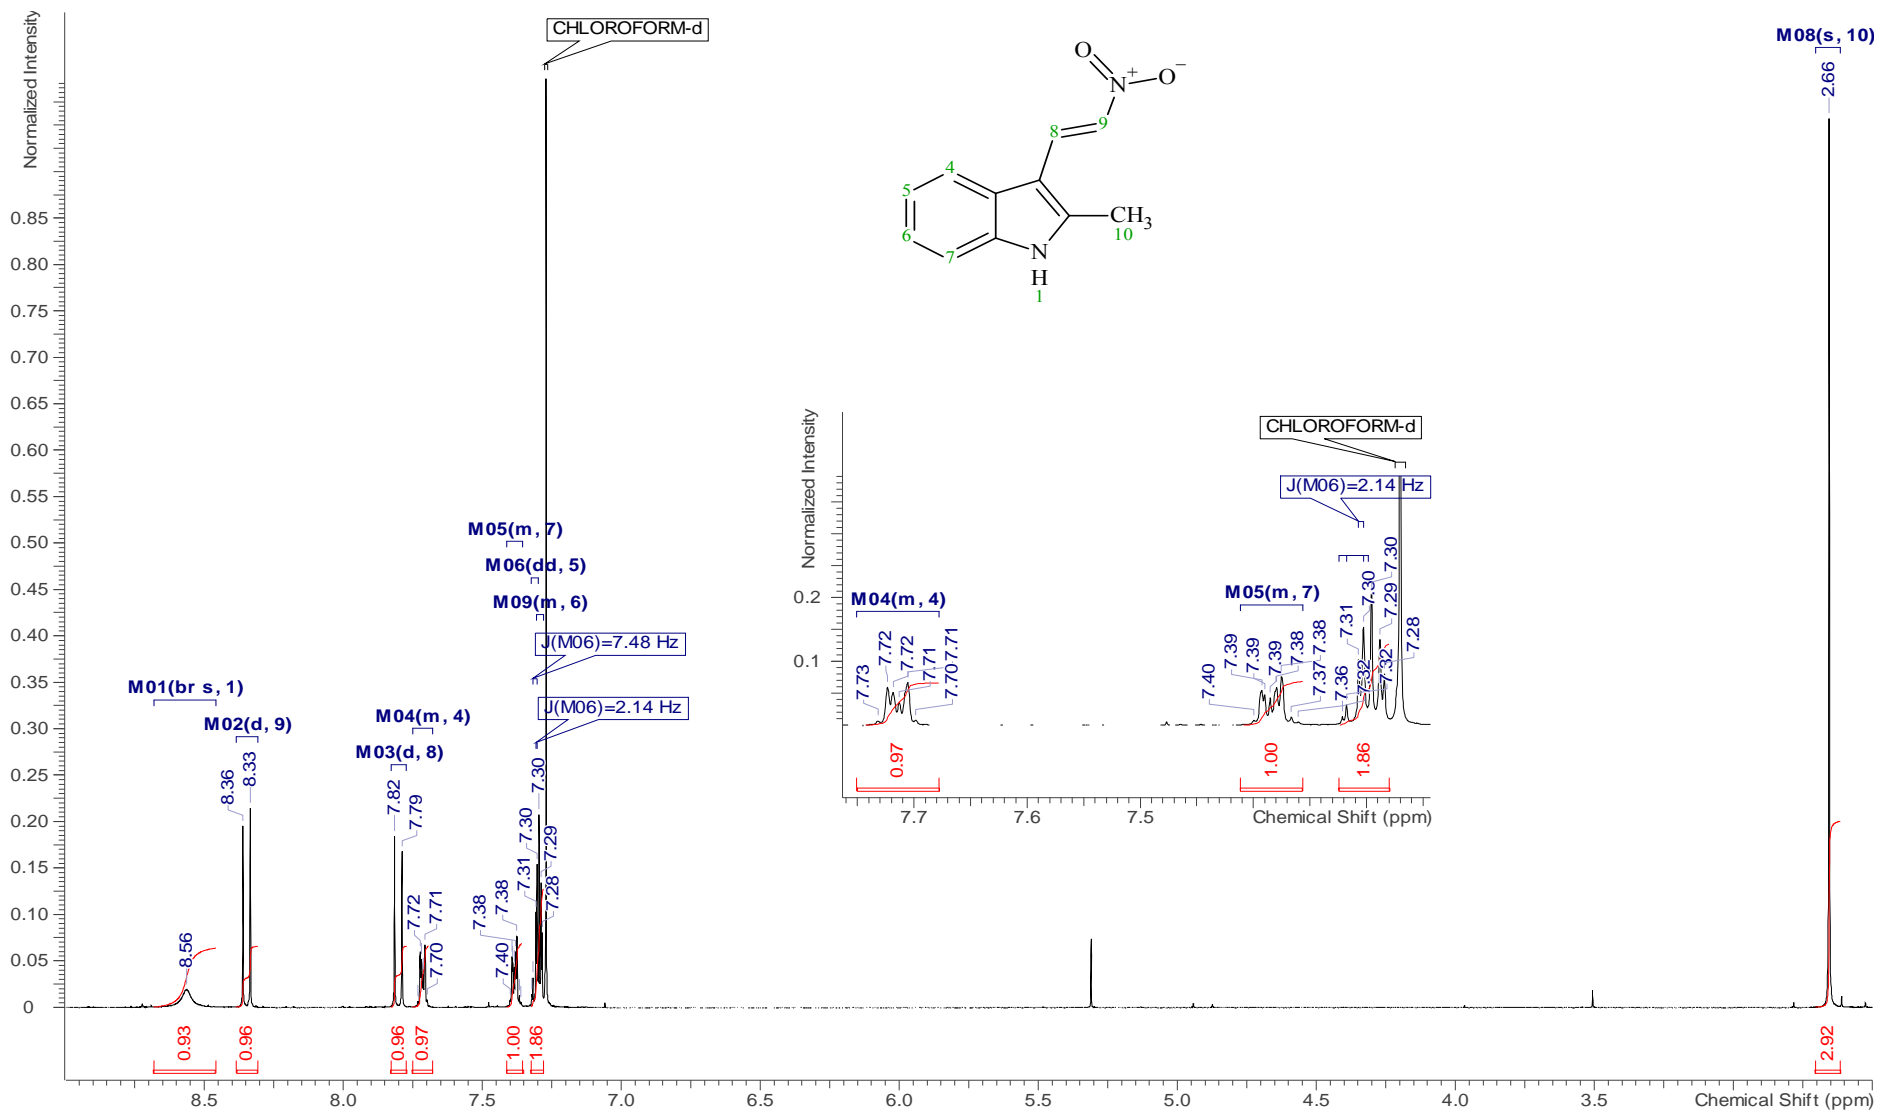

Figure S5. <sup>1</sup>H NMR spectrum of 2-methyl-3-(2-nitro-vinyl)-1H-indole (**2**) in CDCl<sub>3</sub>.

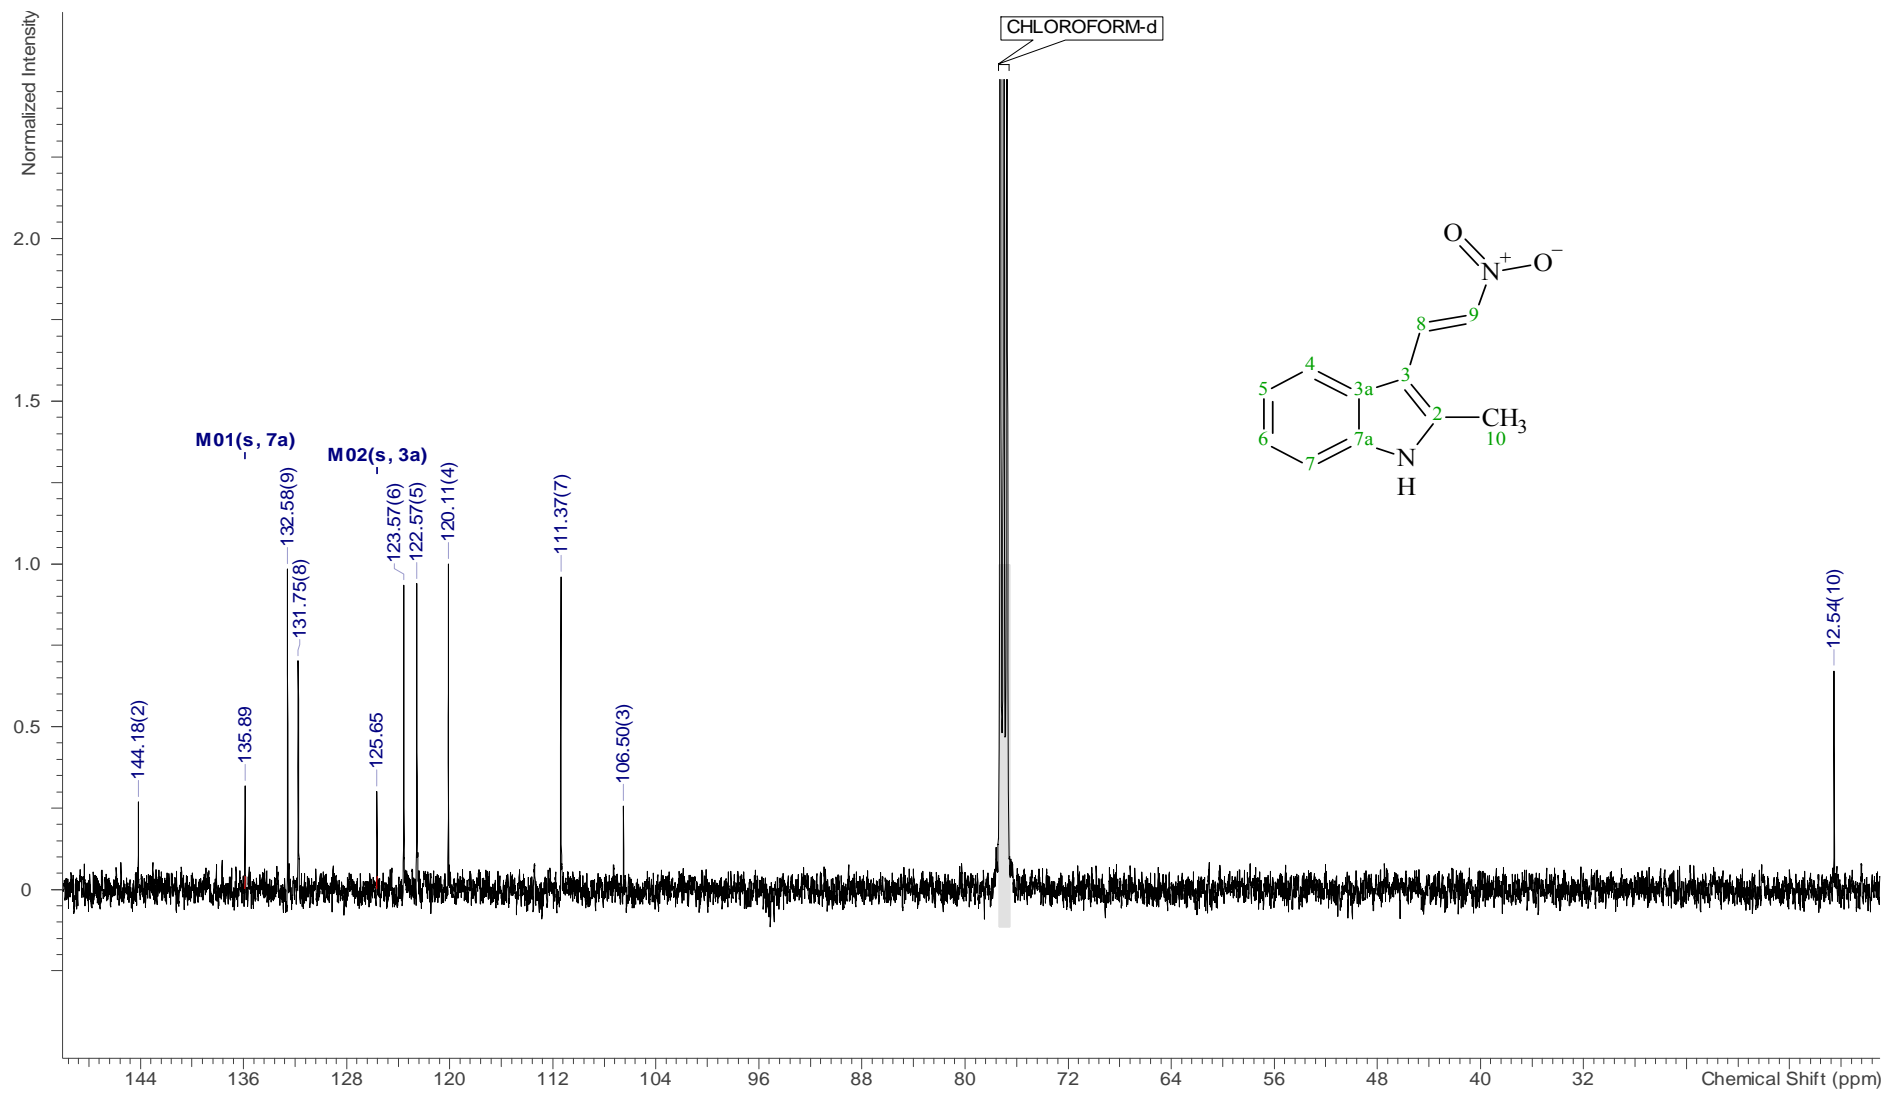

Figure S6.  $^{13}\text{C}$  NMR spectrum of 2-methyl-3-(2-nitro-vinyl)-1H-indole (**2**) in  $\text{CDCl}_3$ .

Table S3. NMR data of 9H-carbazole (**3**) in CDCl<sub>3</sub>

| Pos.   | $\delta_{C(N)}$ | XHn | $\delta_H$ | Mult. | COSY           | H to C      | HMBC             |
|--------|-----------------|-----|------------|-------|----------------|-------------|------------------|
| 1a, 8a | 139.5           | C   |            |       |                |             | 3, 6, 7, 2, 5, 4 |
| 3, 6   | 119.4           | CH  | 7.25m      |       | 7, 2, 8, 1, 5, | 47, 2, 5, 4 |                  |
| 4a, 5a | 123.3           | C   |            |       |                |             | 3, 6, 8, 1, 5, 4 |
| 5, 4   | 120.3           | CH  | 8.10m      |       | 3, 6           |             | 3, 6, 7, 2       |
| 2, 7   | 125.8           | CH  | 7.43m      |       | 3, 6, 8, 1     |             | 3, 6, 8, 1, 5, 4 |
| 1, 8   | 110.5           | CH  | 7.44m      |       | 9, 3, 6, 7, 2  |             | 3, 6, 5, 4       |
| 9      | (108.5)         | NH  | 8.11br s   |       | 8, 1           |             |                  |

<sup>1</sup>H/<sup>13</sup>C at 500.3/125.8 MHz

Figure S7. Correlations in the 2D NMR spectra of 9H-carbazole (**3**) in CDCl<sub>3</sub>

(blue arrows = COSY, green arrows = HMBC).

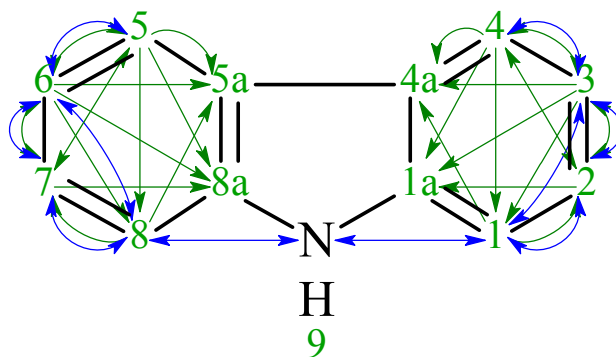



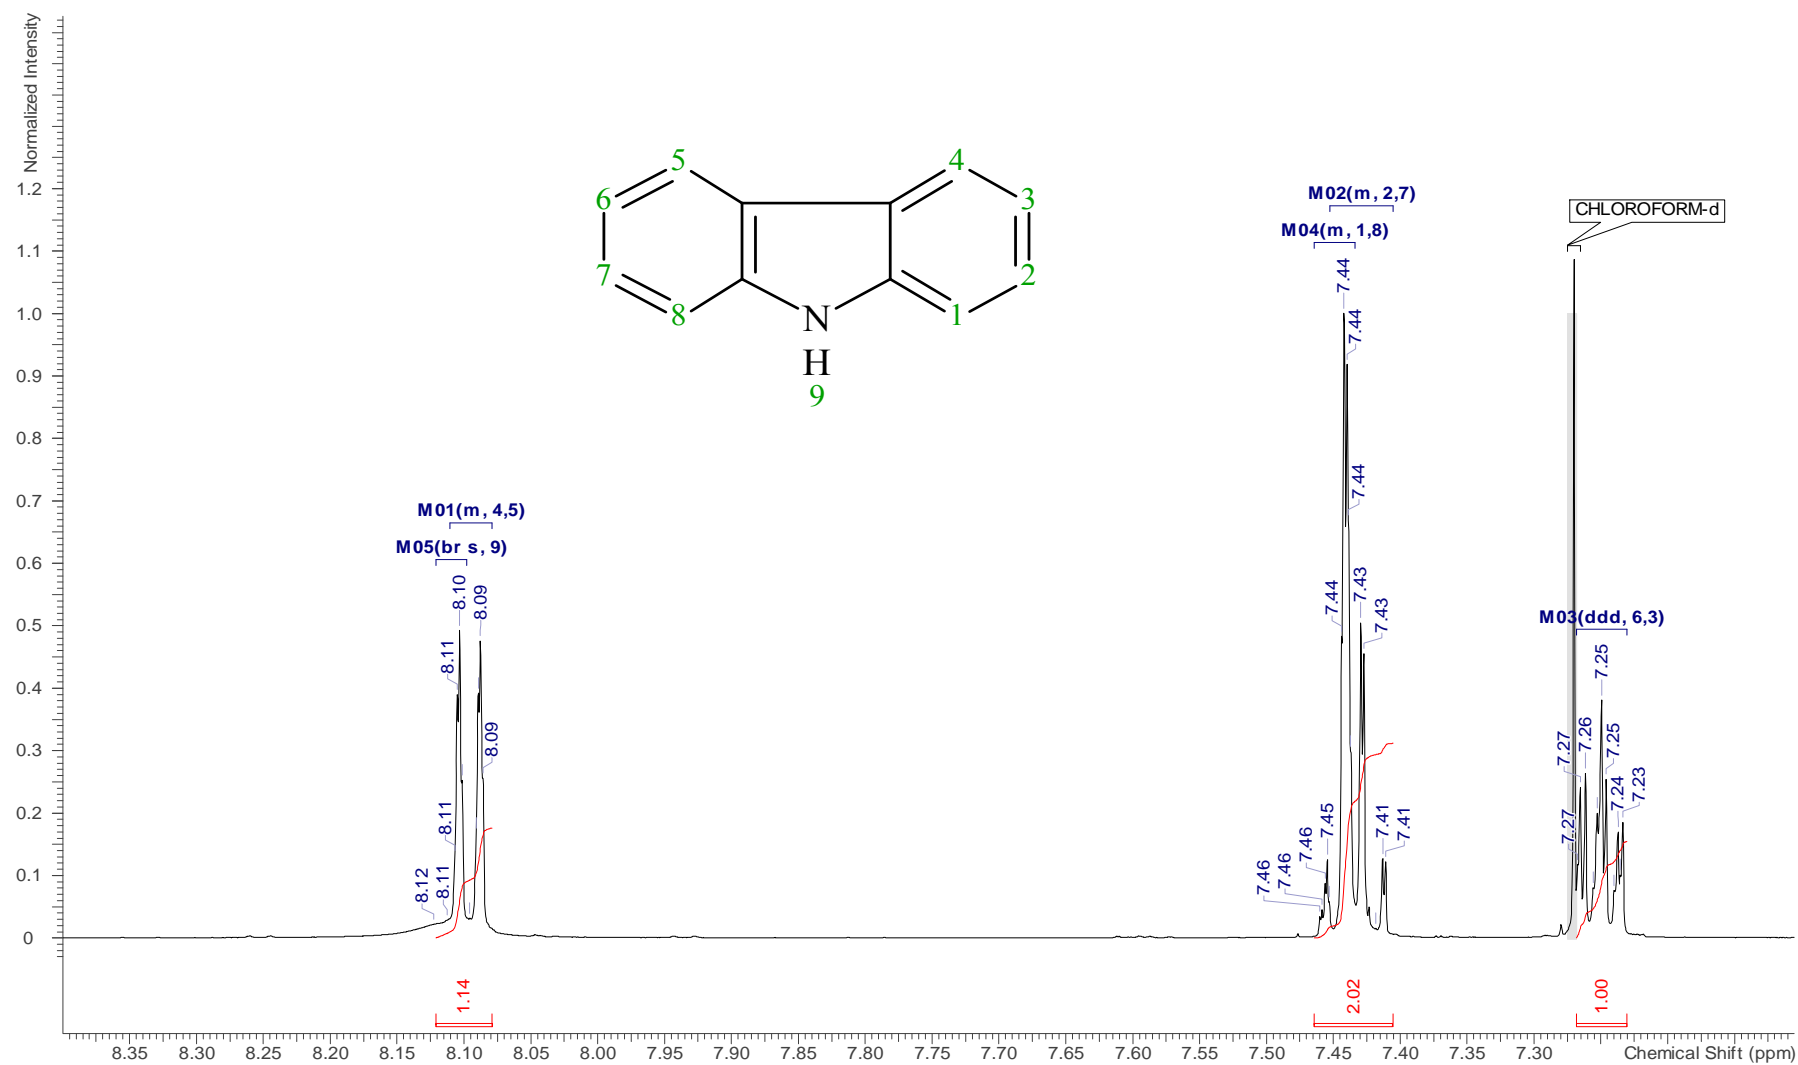Figure S8.  $^1\text{H}$  NMR spectrum of 9H-carbazole (**3**) in  $\text{CDCl}_3$  (500.3 MHz)

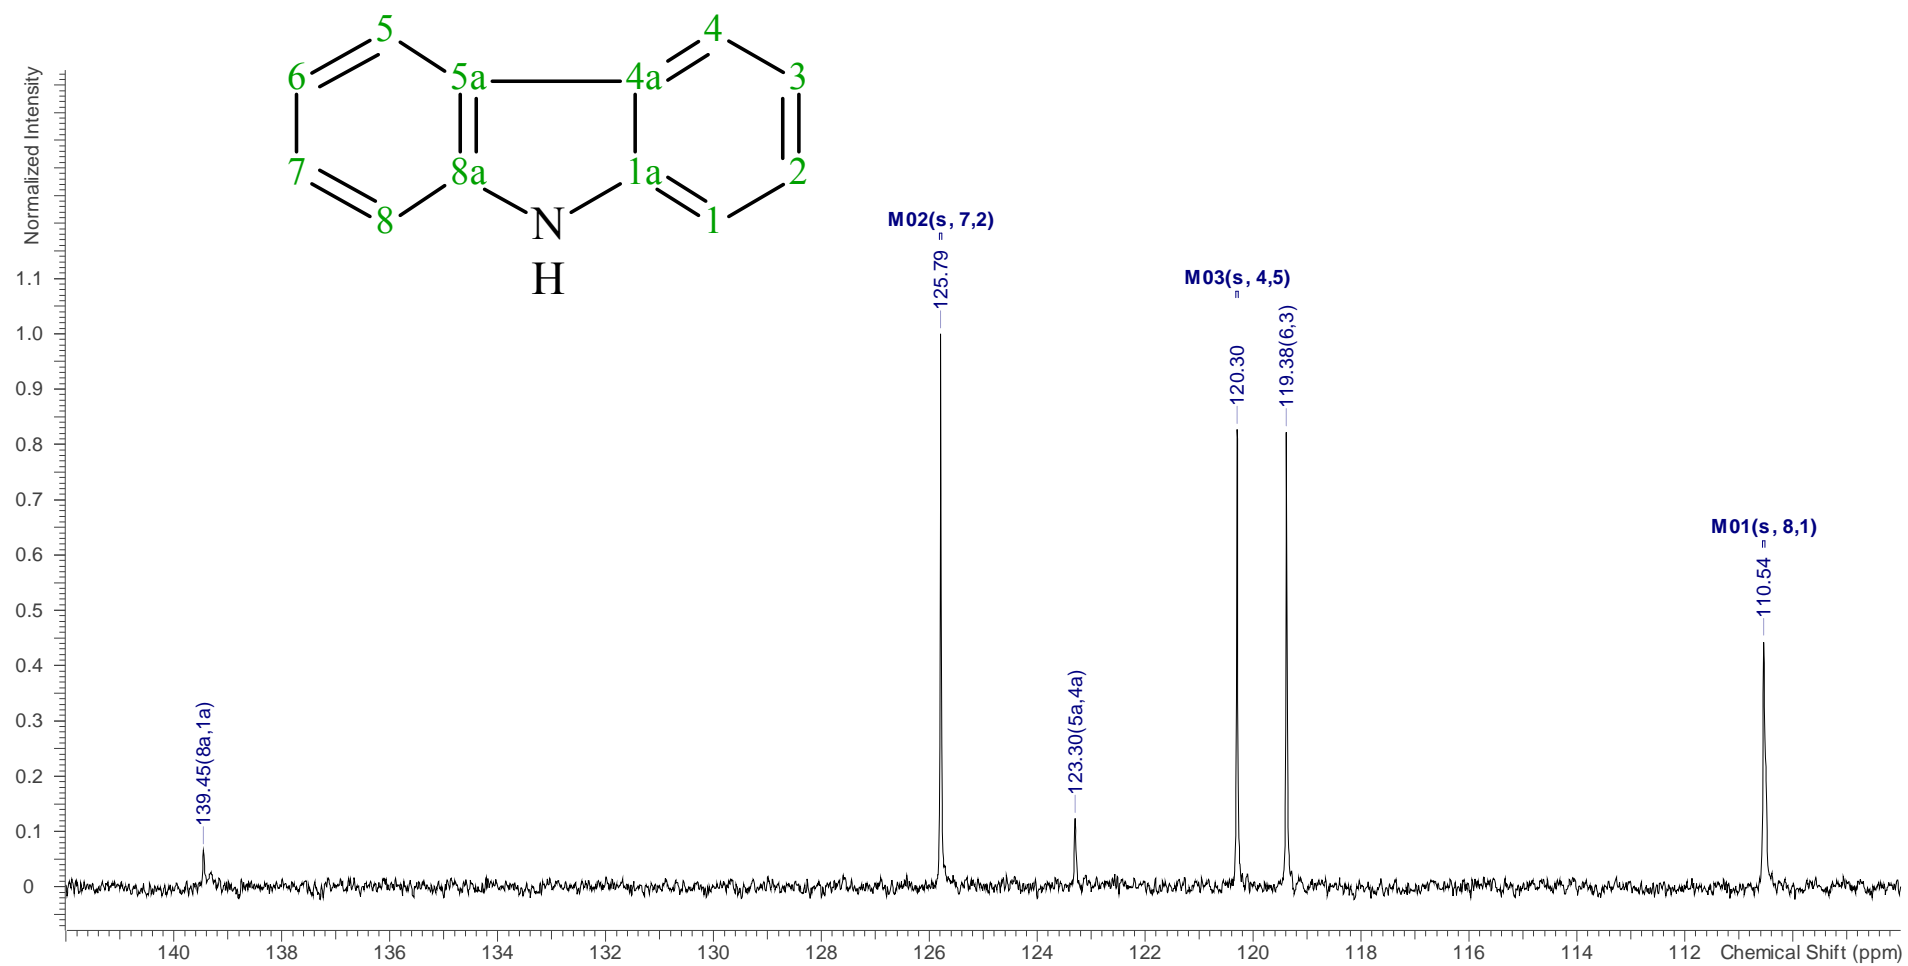

Figure S9.  $^{13}\text{C}$  NMR spectrum of 9H-carbazole (**3**) in  $\text{CDCl}_3$  (125.8 MHz)

Table S 4. NMR Data of 3-chloro-9H-carbazole (**4**) in CD<sub>3</sub>OD (<sup>1</sup>H/<sup>13</sup>C 500.3/125.8 MHz)

| Atom# | C Shift | XHn | H Shift | H Multiplicity      | COSY H to C | HMBC C to H | HMBC H to H  |
|-------|---------|-----|---------|---------------------|-------------|-------------|--------------|
| 1     | 109.0   | NH  |         |                     | 10, 6       |             |              |
| 2     | 139.9   | C   |         |                     | 11, 13      |             |              |
| 3     | 125.7   | C   |         |                     | 10, 9       |             |              |
| 4     | 123.6   | C   |         |                     | 8, 6, 13    |             |              |
| 5     | 142.3   | C   |         |                     | 7, 9        |             |              |
| 6     | 112.1   | CH  | 7.44    | dt (8.1, 0.9)       | 7           | 8, 9        | 8, 4         |
| 7     | 127.5   | CH  | 7.39    | ddd (8.1, 7.0, 1.2) | 8, 6        | 8, 9        | 9, 5         |
| 8     | 120.2   | CH  | 7.16    | ddd (7.9, 7.0, 1.1) | 7, 9        | 6           | 6, 9, 4, 7   |
| 9     | 121.3   | CH  | 8.03    | dt (7.8, 0.8)       | 8           | 8, 7        | 6, 3, 7, 5   |
| 10    | 113.0   | CH  | 7.40    | dd (8.7, 0.5)       | 11          |             | 12, 3, 11    |
| 11    | 126.6   | CH  | 7.32    | dd (8.5, 2.1)       | 10, 13      | 10, 13      | 13, 12, 2    |
| 12    | 125.2   | C   |         |                     | 11, 10, 13  |             |              |
| 13    | 120.7   | CH  | 8.03    | dd (2.1, 0.4)       | 11          | 11          | 4, 12, 11, 2 |

Figure S10. Correlations in the 2D NMR spectra of 3-chloro-9H-carbazole (**4**) in CD<sub>3</sub>OD.

(blue and red COSY, green HMBC)

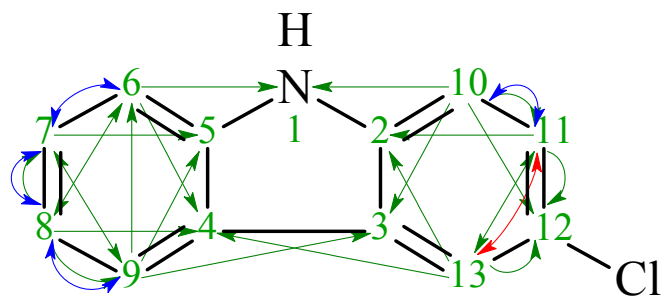

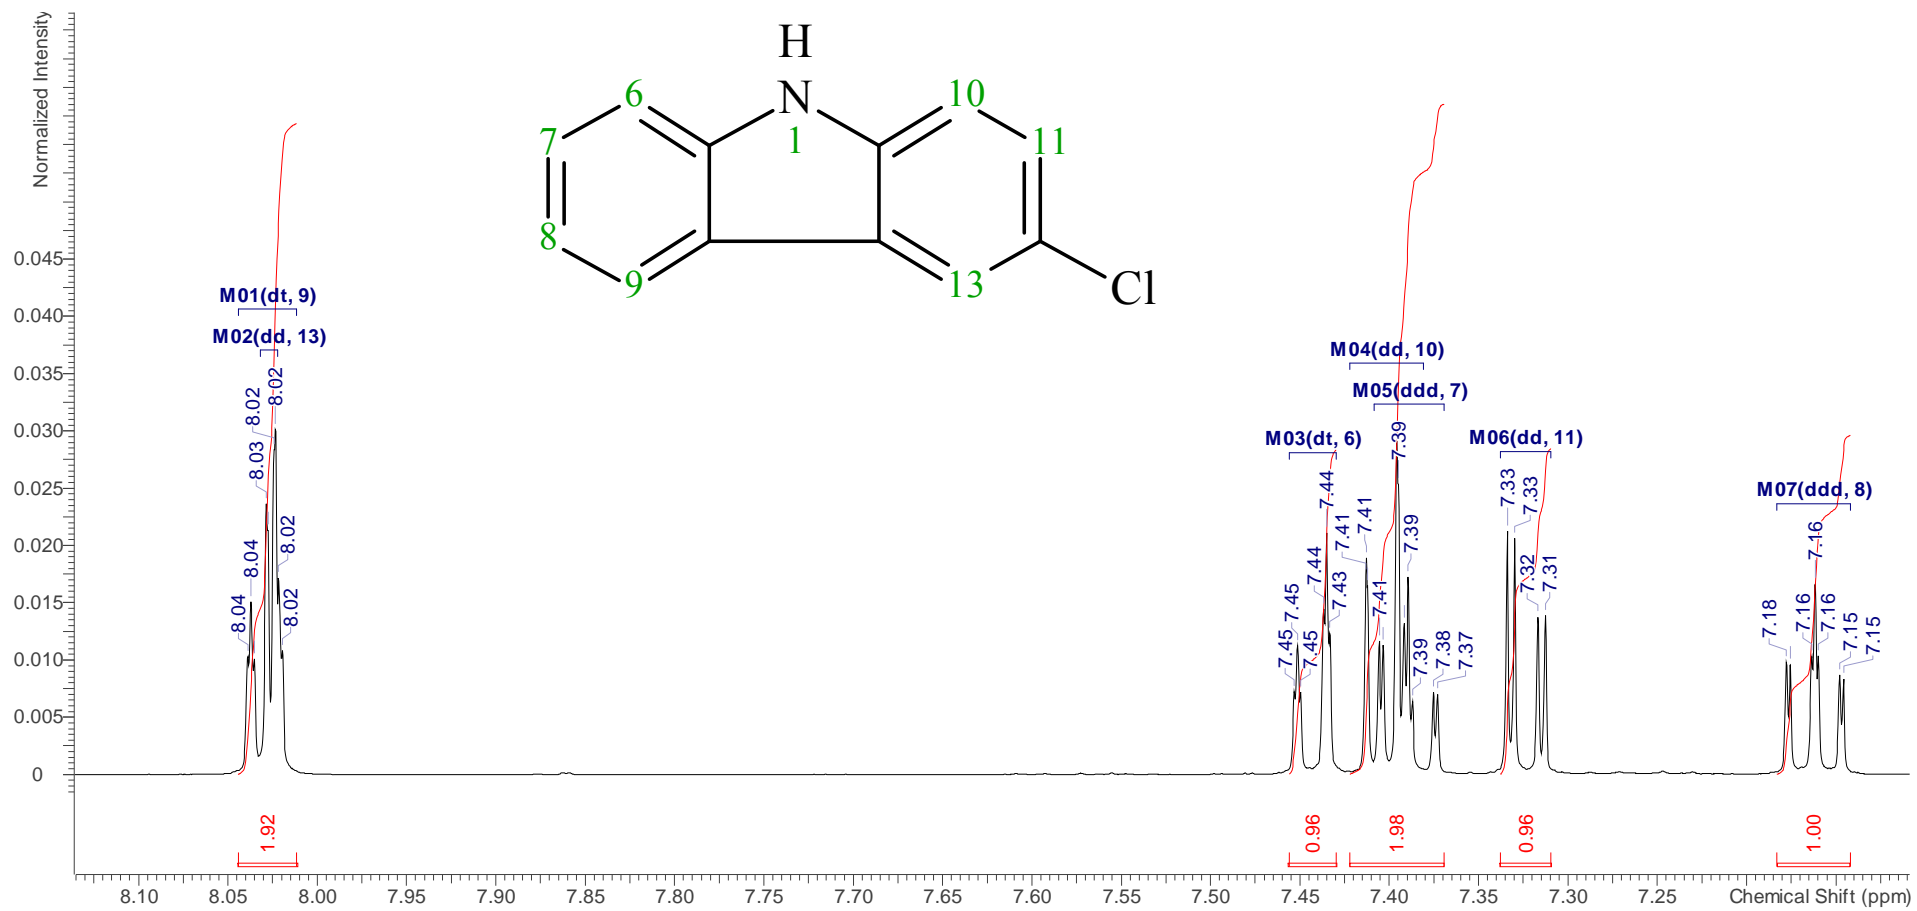

Figure S11. <sup>1</sup>H NMR spectrum of 3-chloro-9H-carbazole (**4**) in CD<sub>3</sub>OD (500.3 MHz)

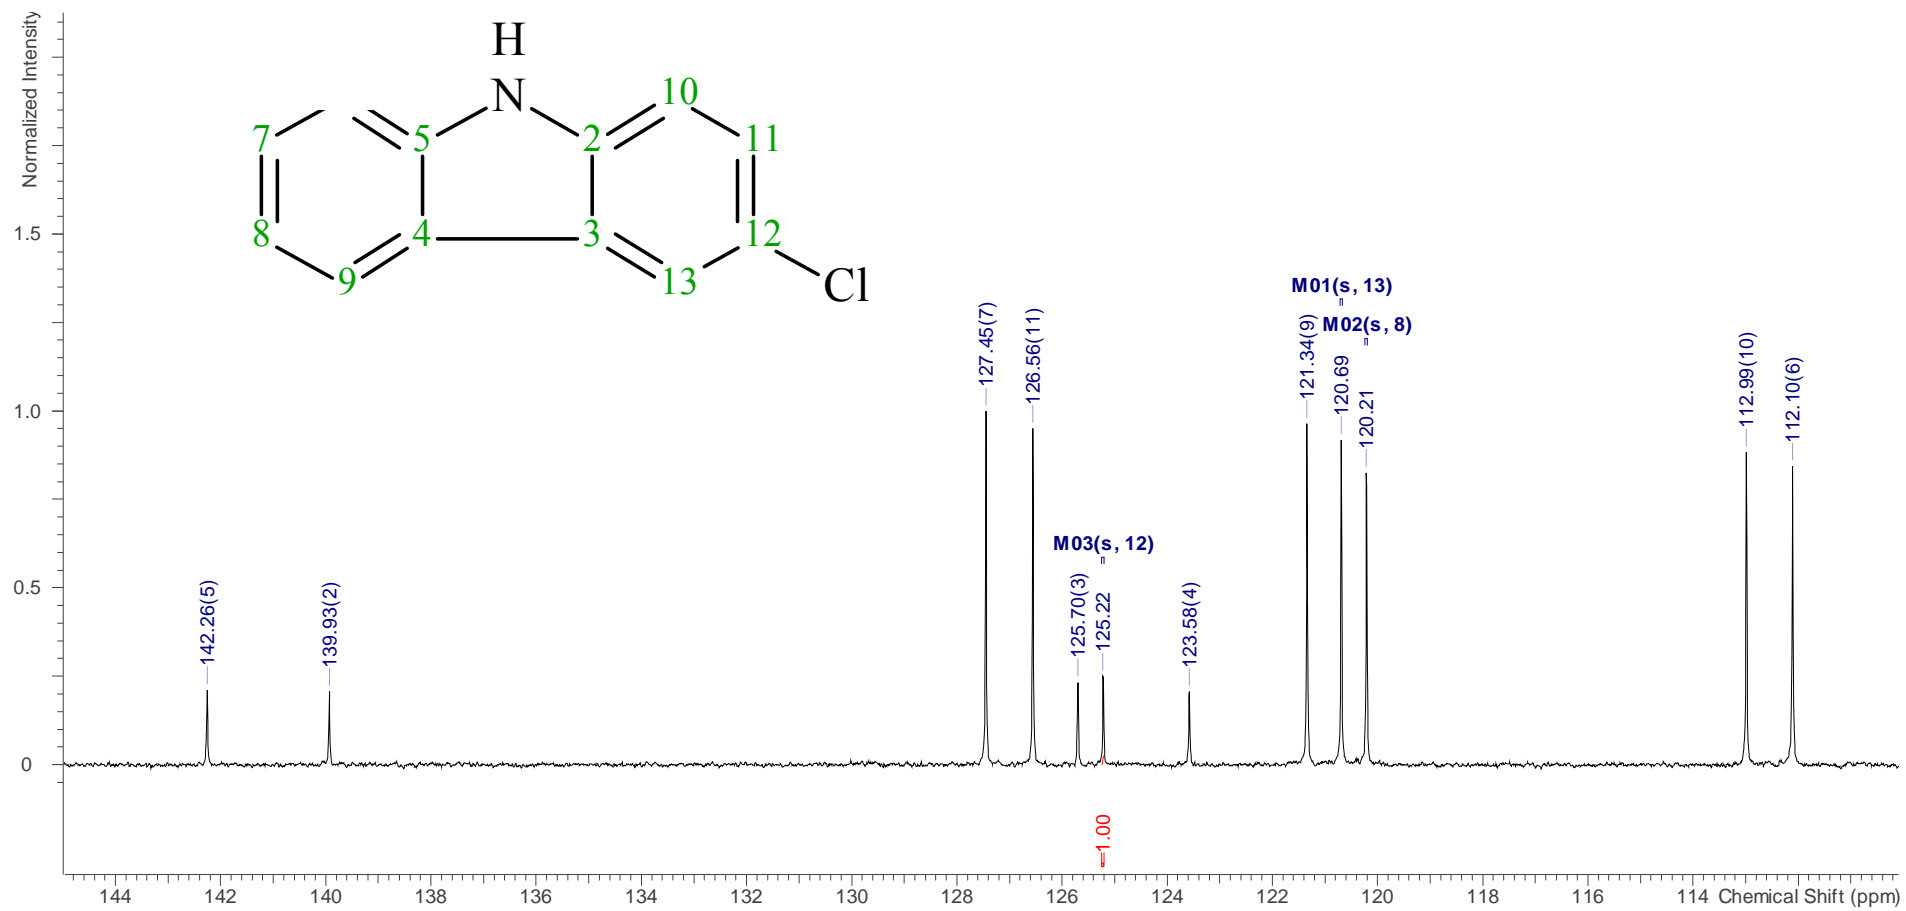

Figure S12. <sup>13</sup>C NMR spectrum of 3-chloro-9H-carbazole (**4**) in CD<sub>3</sub>OD (125.8 MHz)

Table S 5. NMR Data of 4-hydroxymethyl-quinoline (5)

| C Atom# | C Shift | XHn             | H Shift | H Multiplicity         | COSY  | H to C<br>HMBC | C to H<br>HMBC |
|---------|---------|-----------------|---------|------------------------|-------|----------------|----------------|
| 11      | 61.479  | CH <sub>2</sub> | 5.240   | d (0.76)               | 3     | 3              | 3, 5, 4        |
| 3       | 118.130 | CH              | 7.565   | dd (5.42, 0.99)        | 11, 2 | 11, 2          | 11, 2          |
| 6       | 122.854 | CH              | 7.961   | dd (8.39, 0.76)        | 7.58  | 7.72           | 8, 10          |
| 5       | 125.767 | C               |         |                        |       | 11, 7, 9       |                |
| 7       | 126.812 | CH              | 7.577   | td (7.02, 7.02, 1.22)  | 8, 6  |                | 5, 9           |
| 8       | 129.462 | CH              | 7.723   | ddd (8.39, 6.94, 1.30) | 7, 9  | 6              | 6, 10          |
| 9       | 129.629 | CH              | 8.142   | d (8.54)               | 8     | 7              | 5              |
| 4       | 146.866 | C               |         |                        |       | 11             |                |
| 10      | 147.313 | C               |         |                        |       | 8, 6, 2        |                |
| 2       | 150.026 | CH              | 8.850   | d (4.43)               | 3     | 3              | 3, 10          |
| 1       |         | N               |         |                        |       | 11, 3, 9, 2    |                |

Figure S13. Correlations in the 2D NMR spectra of 4-hydroxymethyl-quinoline (5) in CD<sub>3</sub>OD. (blue and red COSY, green HMBC)

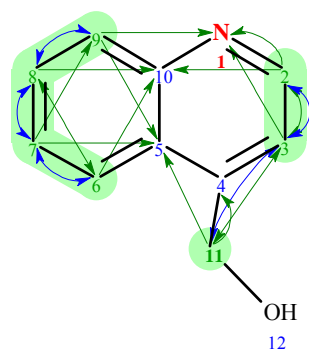

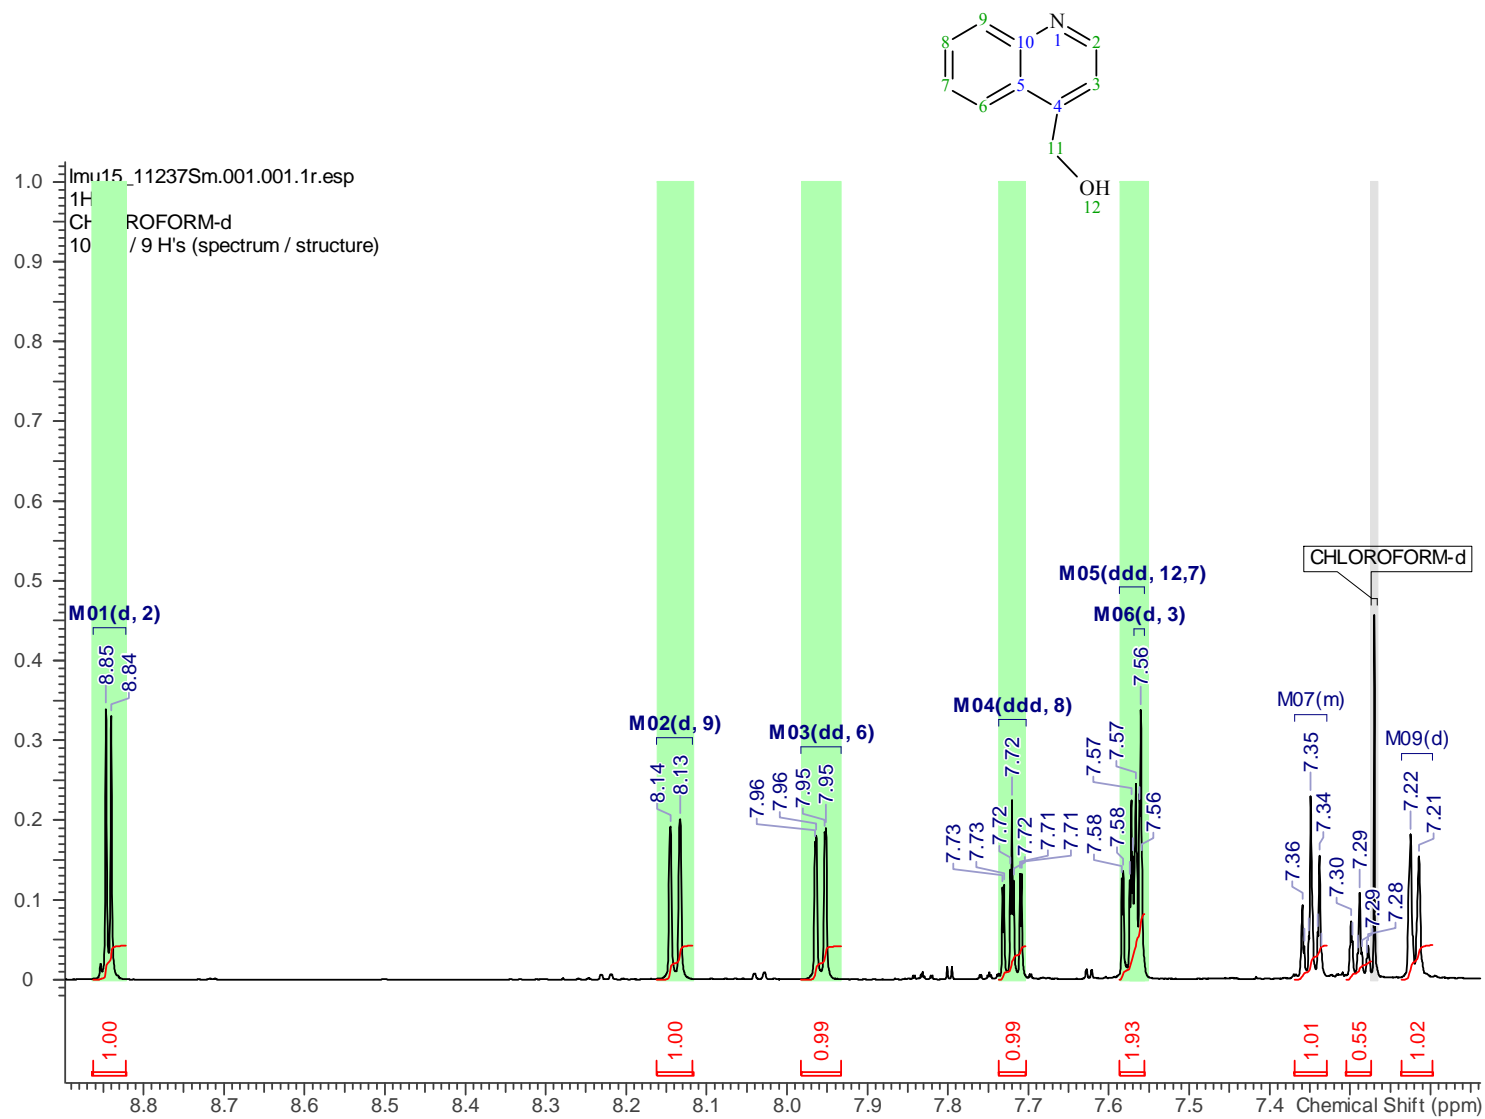

Figure S14. <sup>1</sup>H NMR spectrum of 4-hydroxymethyl-quinoline (**5**) in CD<sub>3</sub>OD (500.3 MHz)

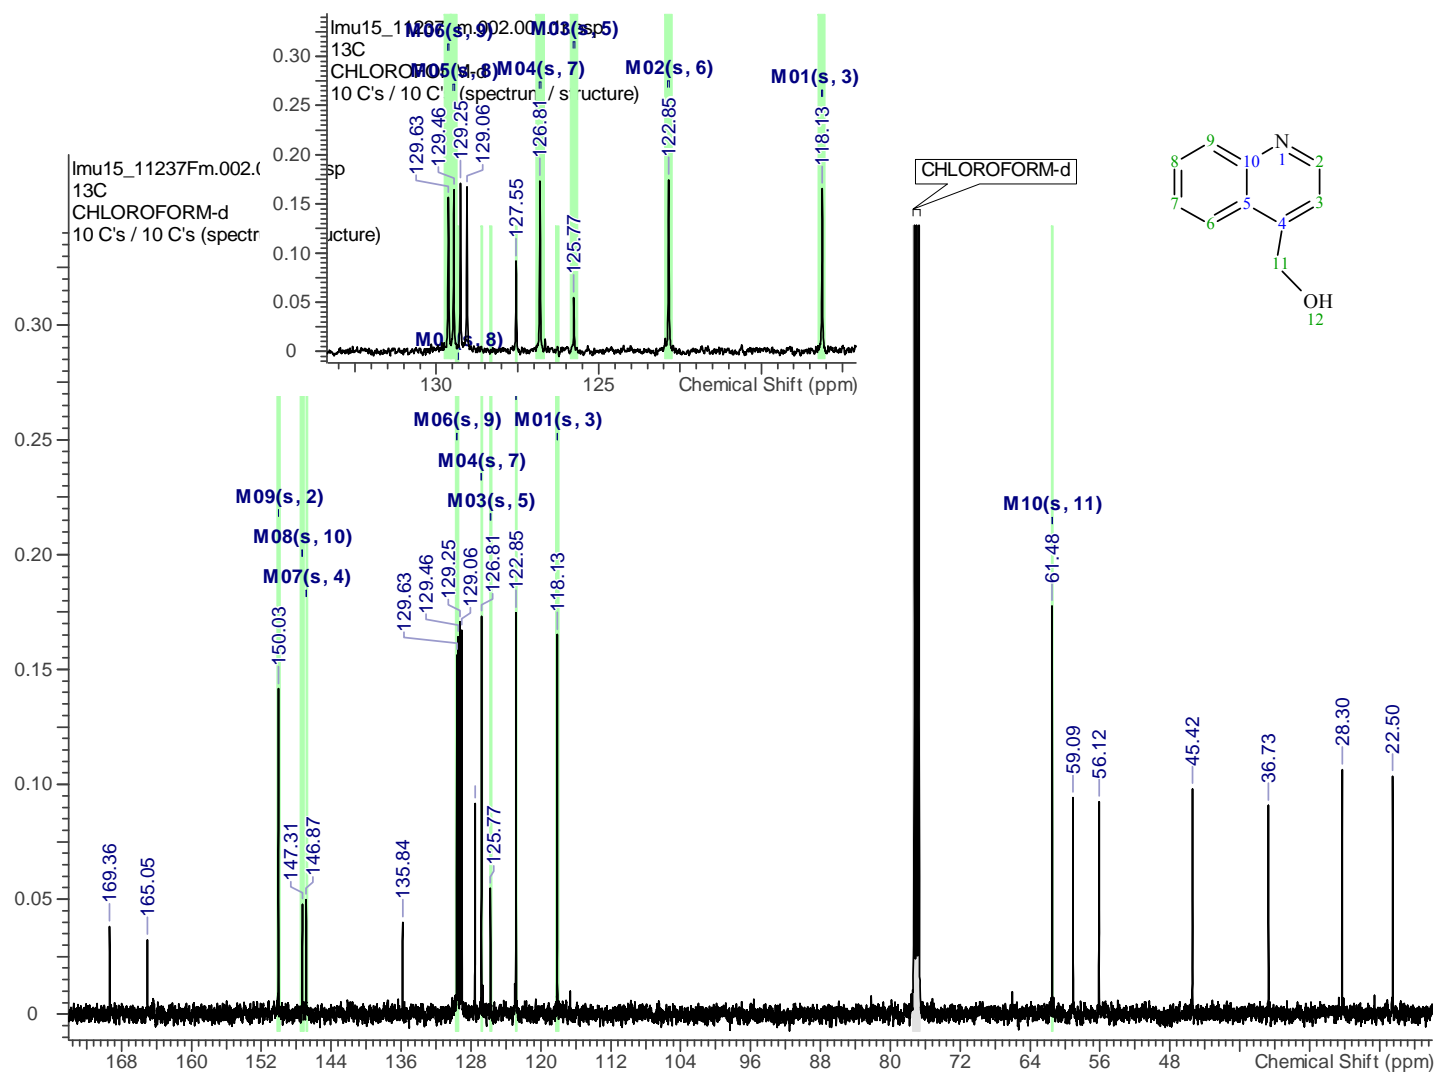

Figure S15.  $^{13}\text{C}$  NMR spectrum of 4-hydroxymethyl-quinoline (5) in  $\text{CD}_3\text{OD}$ . (500.3 MHz)



Table S 6. NMR Data of 3,6-Dibenzylpyrazin-2(1*H*)-one (**6**) ( $^1\text{H}/^{13}\text{C}$  500.3/125.8 MHz)

| C Atom#    | C Shift | XHn             | H Shift | H Multiplicity | COSY       | H to C HMBC    | C to H HMBC        |
|------------|---------|-----------------|---------|----------------|------------|----------------|--------------------|
|            |         | NH              | 12.33   | br s           |            |                |                    |
| 1          | 120.6   | CH              | 7.10    | m              |            | 3              |                    |
| 3          | 35.4    | CH <sub>2</sub> | 3.75    | s              |            |                | 1, 9, 5, 4         |
| 3'         | 38.3    | CH <sub>2</sub> | 3.91    | s              | 8', 6', 7' | 8', 6', 7'     | 9', 5', 4', 1', 2' |
| 1', 2'     | 156.0   | C               |         |                |            | 3'             |                    |
| 4          | 137.4   | C               |         |                |            | 9', 5', 3      |                    |
| 2, 4'      | 138.1   | C               |         |                |            | 3', 8', 6', 7' |                    |
| 7          | 126.1   | CH              | 7.17    | m              | 8, 6       | 8, 6           |                    |
| 8, 6       | 126.7   | CH              | 7.23    | m              | 7          | 9, 5, 7        | 7                  |
| 9', 5'     | 128.5   | CH              | 7.30    | m              |            | 5, 9           | 5, 9               |
| 9, 5       | 128.7   | CH              | 7.30    | m              |            | 3              | 8, 6               |
| 8', 6', 7' | 128.2   | CH              | 7.24    | m              | 3'         |                | 3', 4'             |

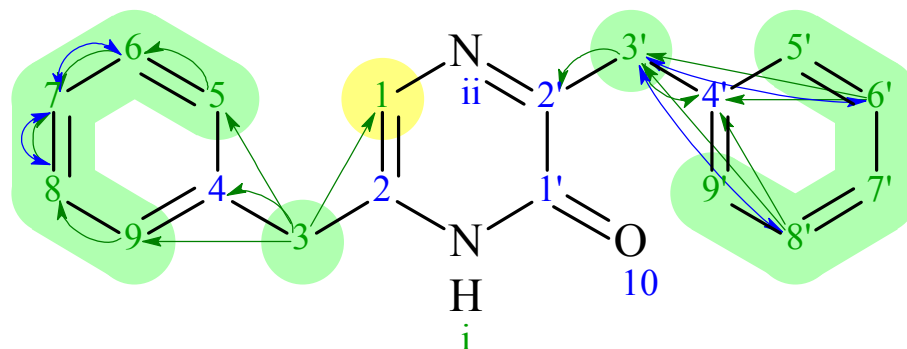

Figure S16. Correlations in the 2D NMR spectra of 3,6-Dibenzylpyrazin-2(1*H*)-one (**6**) in DMSO-d<sub>6</sub>.

(blue and red COSY, green HMBC)

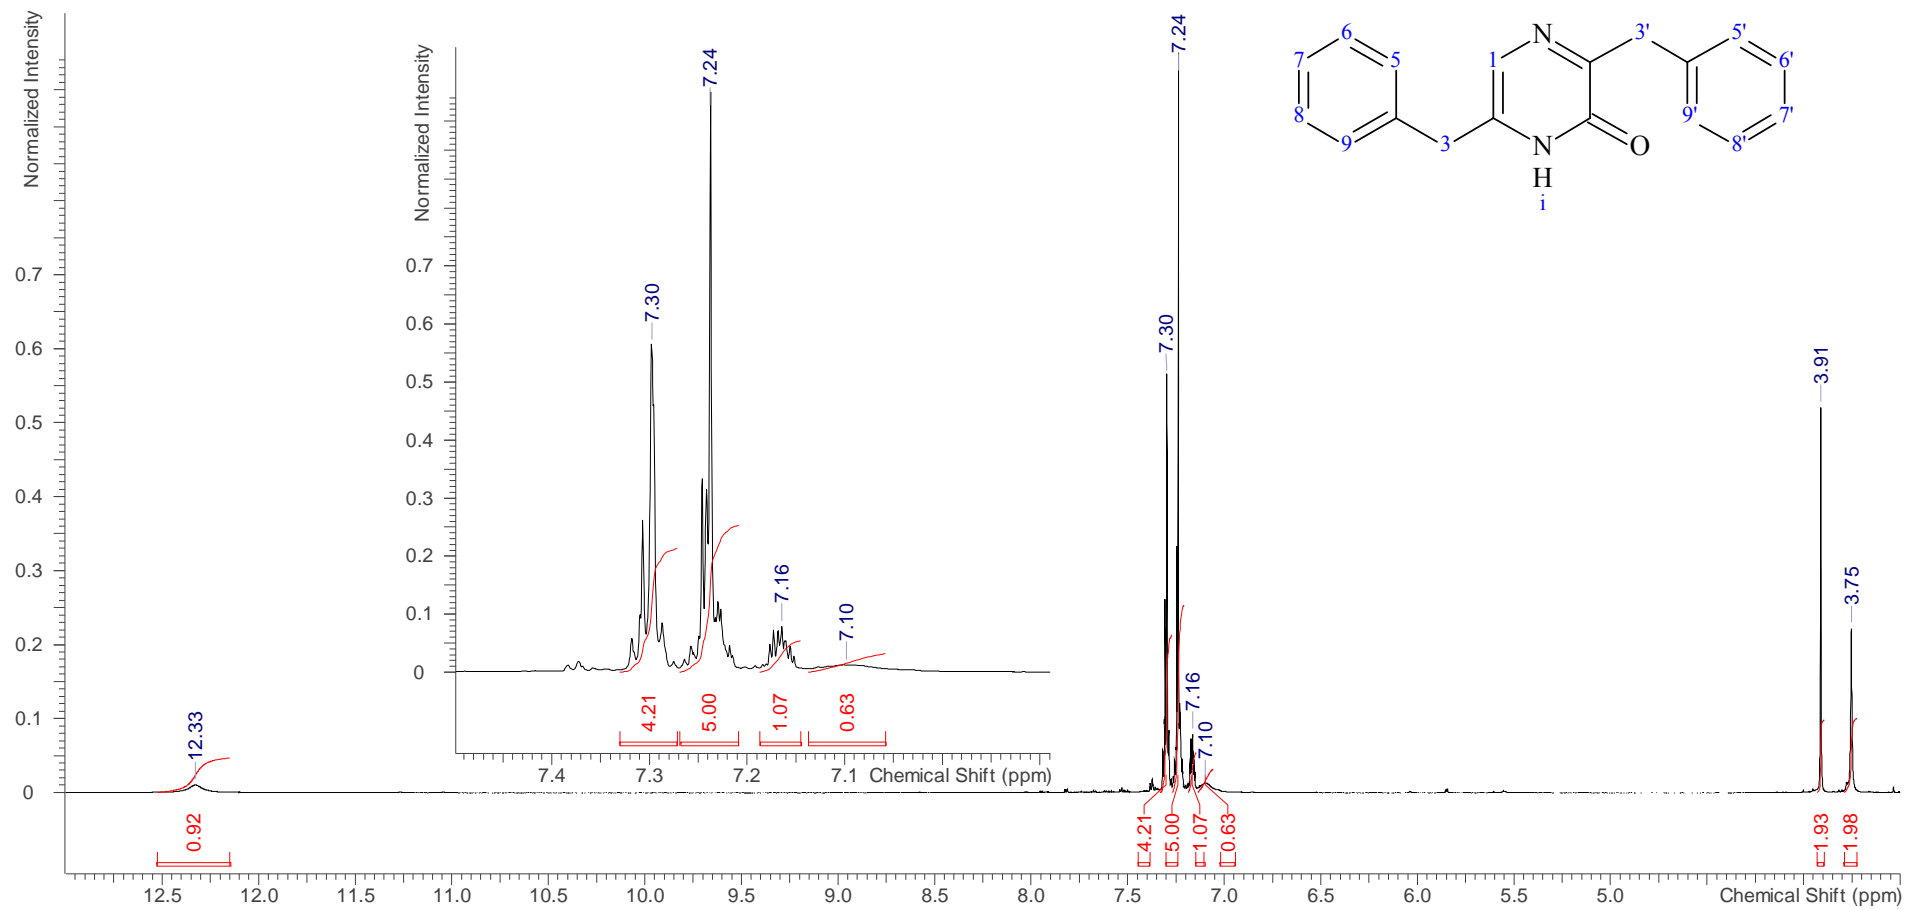

Figure S17. <sup>1</sup>H NMR spectrum of 3,6-dibenzylpyrazin-2(1H)-one (**6**) in DMSO-d<sub>6</sub> (700.4 MHz).

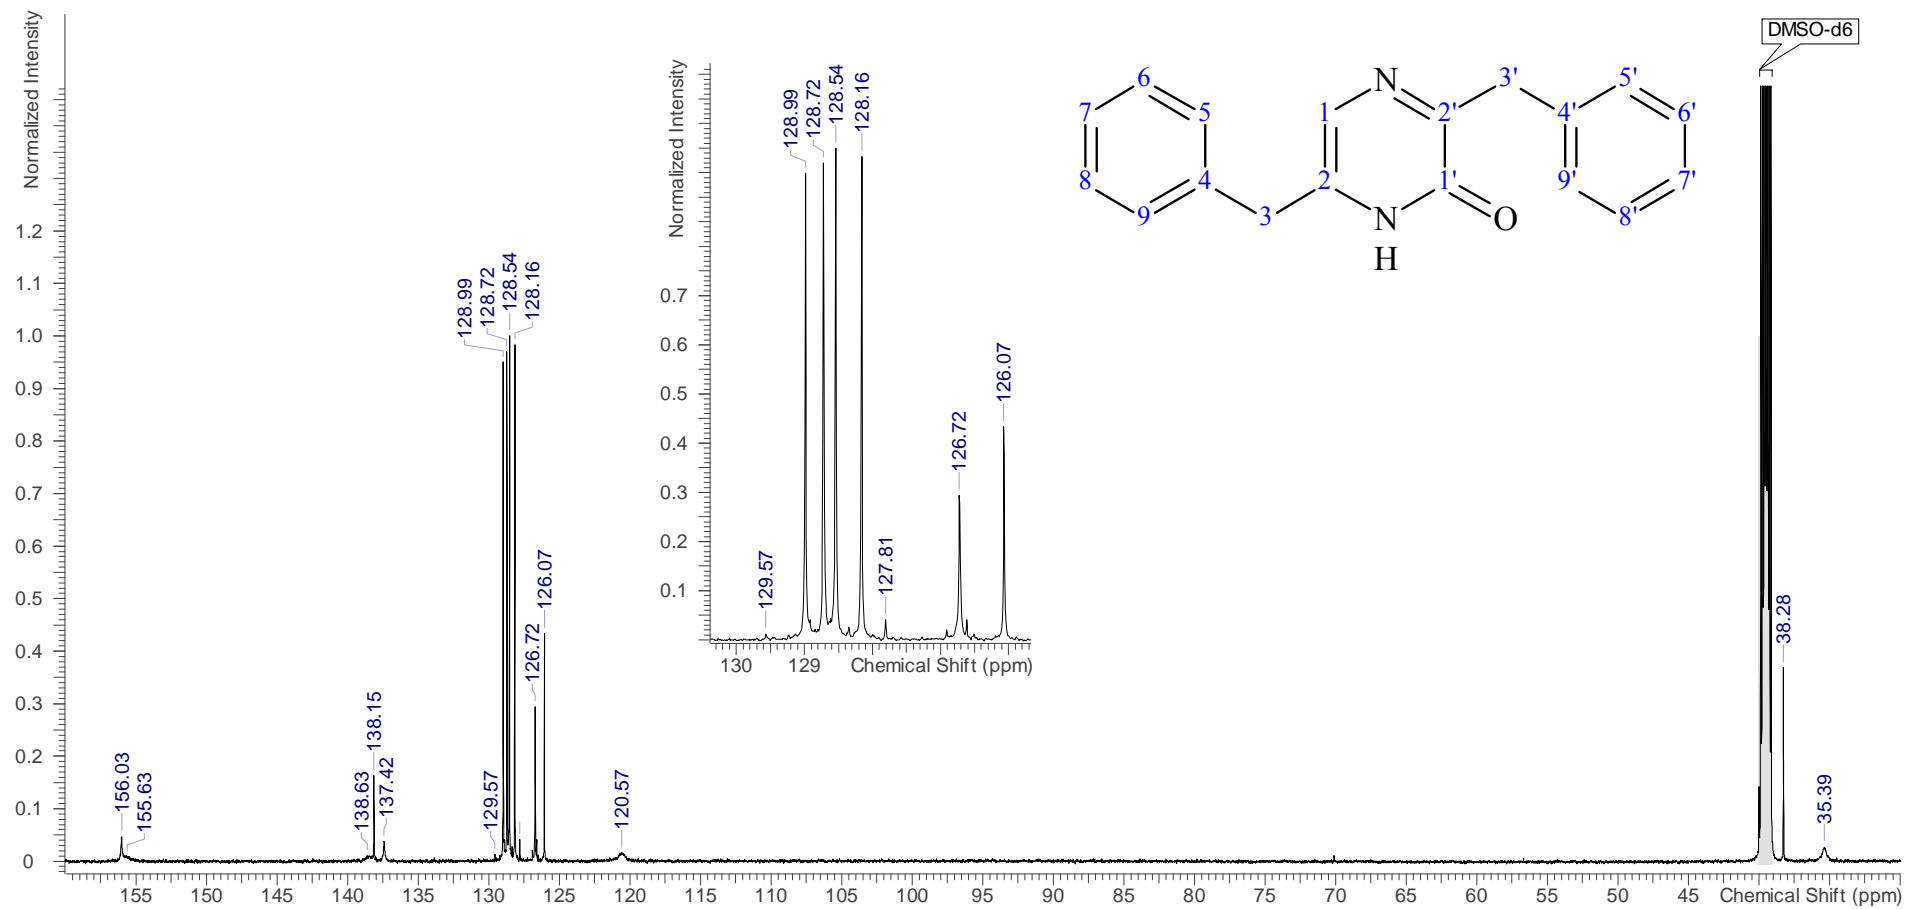

Figure S18.  $^{13}\text{C}$  NMR spectrum of 3,6-dibenzylpyrazin-2(1H)-one (**6**) in  $\text{DMSO-d}_6$  (176.1 MHz).

Figure S19. Antiviral activity against HCV (Hepatitis-C-Virus) Results

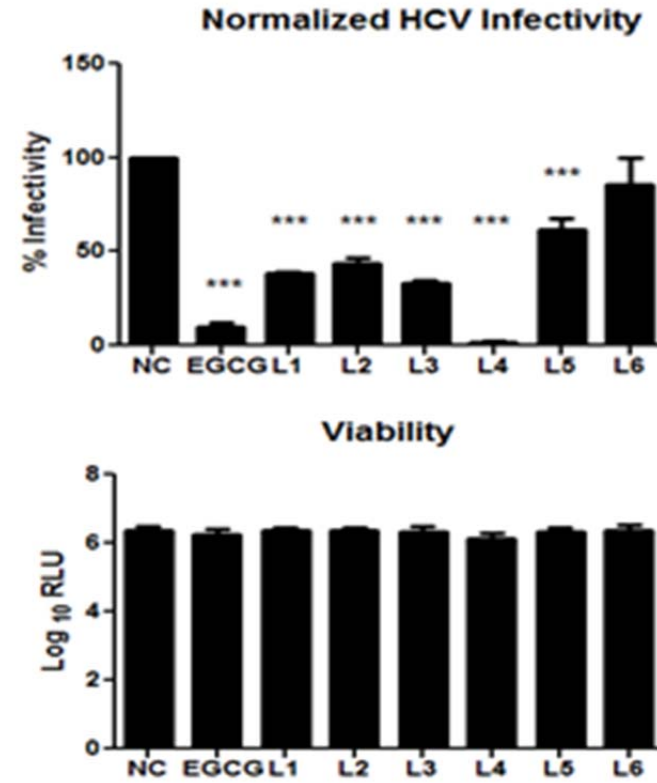

The assay was performed in quadruplicate (L1-L2) and triplicate (L3-L6) and is presented as the mean  $\pm$  standard deviation. \*\*\*  $P \leq 0.05$ .
